# Supplementary material for: “It Changes Your Orbit”: The Impact of Suicide and Traumatic Death on Adolescents as Experienced by Adolescents and Parents
Source: MDPI journal article supplement (doi:10.3390/ijerph17249356), 2020-12-14
Supplement: s1 [file s1]

**Supplementary Table S1:** Sociodemographic characteristics of participants (N = 38)

|                                                                     | <b>Adolescents (n = 20)</b>                                                                                     | <b>Parents (n = 18)</b>                                                                                 |
|---------------------------------------------------------------------|-----------------------------------------------------------------------------------------------------------------|---------------------------------------------------------------------------------------------------------|
| <b>Age (years)</b>                                                  | Range 14-26; M=19.50 (SD=2.95)                                                                                  | Range 43-60; M=53.20 (SD=4.35)                                                                          |
| <b>Gender</b>                                                       | F/M: 16/4                                                                                                       | F/M: 18/0                                                                                               |
| <b>Years since death</b>                                            | M=3.92 (SD=2.49)                                                                                                | M=5.31 (SD=2.89)                                                                                        |
| <b>Cause of death of close person</b>                               | Suicide (n = 18)<br>Accident (n = 2)                                                                            | Suicide (n = 13)<br>Accident (n = 2)<br>Manslaughter (n = 1)<br>Illness (n = 1)<br>Undetermined (n = 1) |
| <b>Relationship of the bereaved adolescent with deceased person</b> | Father (n = 9)<br>Brother (n = 2)<br>Sister (n = 2)<br>Mother (n = 2)<br>Other family (n = 2)<br>Friend (n = 2) | Father (n = 10)<br>Brother (n = 4)<br>Sister (n = 4)                                                    |
